# Supplementary material
Source: PubMed Central journal article supplement (PMC4492400)
Supplement: supp_ddv174_ddv174supp.pdf [file supp_ddv174_ddv174supp.pdf]

**Supplemental figure 1:** Cloning strategy.

A) The complete nucleotide sequence of  $\alpha 1$ ACT, with its endogenous start and stop codons, was subcloned from the C-terminal portion of human  $\alpha 1$ A cDNA into pWalium10(moe) (red portion of the vector). Also shown are the annealing sites for primers used to confirm that pWalium landed into attP2 in the correct orientation.

B) PCR from genomic DNA showing that the transgene landed into attP2 in the correct orientation. Isogenic ctrl: this is the line into which the transgenes were injected.

C) qRT-PCR of  $\alpha 1$ ACT message in pupae, driven by sqh-Gal4. N=3.

**Supplemental figure 2:** (A-C) summary of toxicity from  $\alpha 1$ ACT(Q70) when it is expressed throughout the fly by itself or alongside potential modifiers.

**Supplemental table 1:** Comprehensive list of fly stocks used.

Supplemental figure 1

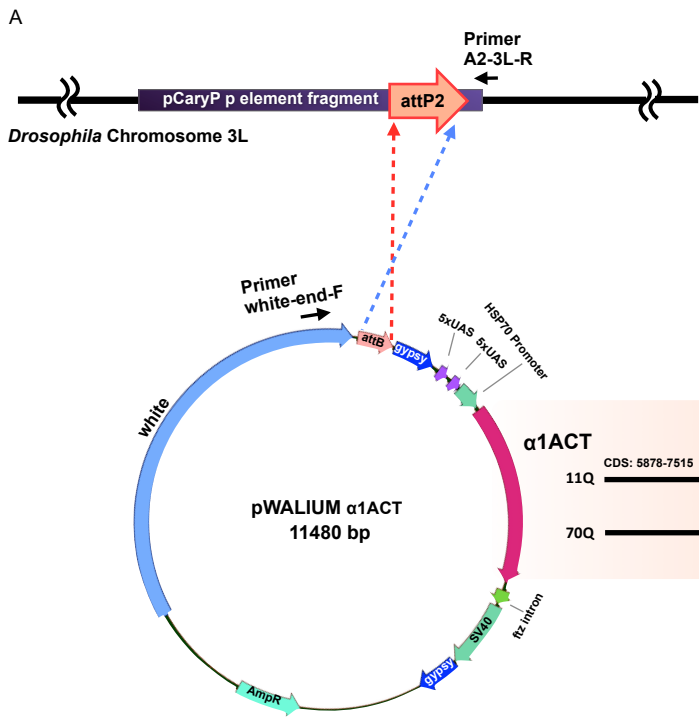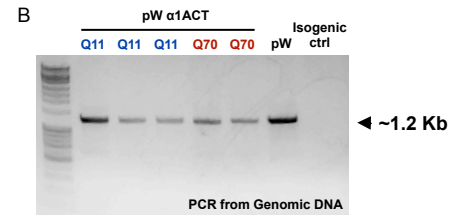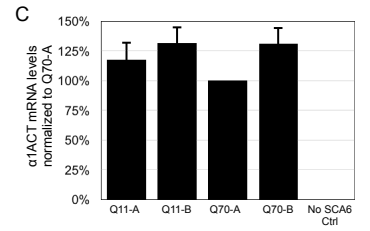

## Supplemental figure 2

A

| <b>Sqh-Gal4 driving<br/><math>\alpha</math>1ACT(Q70)</b> |                                                       |
|----------------------------------------------------------|-------------------------------------------------------|
| <b>Without<br/><math>\alpha</math>1ACT(Q11)</b>          | <b>With<br/><math>\alpha</math>1ACT(Q11)</b>          |
| Pharate adult lethality & adult death during eclosion    | Pharate adult lethality & adult death during eclosion |

B

| <b>Sqh-Gal4 driving<br/><math>\alpha</math>1ACT(Q70)</b> |                                                        |
|----------------------------------------------------------|--------------------------------------------------------|
| <b>Without UAS-DnaJ-1</b>                                | <b>With UAS-DnaJ-1</b>                                 |
| Pharate adult lethality & adult death during eclosion    | Adults eclose successfully and survive two-three weeks |

C

| <b>Sqh-Gal4 driving<br/><math>\alpha</math>1ACT(Q70)</b> |                                                       |
|----------------------------------------------------------|-------------------------------------------------------|
| <b>Wild Type Kap-<math>\alpha</math>3</b>                | <b>Heterozygous<br/>Kap-<math>\alpha</math>3[D93]</b> |
| Pharate adult lethality & adult death during eclosion    | Pharate adult lethality & adult death during eclosion |

## Supplemental table 1

| Genotype                                            | Source      | FlyBase ID  | Stock Number | Associated alleles         | Description                            | Shown in the figures |
|-----------------------------------------------------|-------------|-------------|--------------|----------------------------|----------------------------------------|----------------------|
| y[1] sc[*] v[1]; P{y[+7.7]}=UAS-Ctrl}attP2          | Todi Lab    |             |              | pWaiium10-moe-empty vector | Isogenic host strain for the 1aCT line | Yes                  |
| y[1] sc[*] v[1]; P{y[+7.7]}=UAS-1aCT-11Q}attP2.15-7 | Todi Lab    |             |              | CACNA1A                    | UAS-1aCT-11Q                           | Yes                  |
| y[1] sc[*] v[1]; P{y[+7.7]}=UAS-1aCT-11Q}attP2.15-8 | Todi Lab    |             |              | CACNA1A                    | UAS-1aCT-11Q                           | Yes                  |
| y[1] sc[*] v[1]; P{y[+7.7]}=UAS-1aCT-70Q}attP2.1A   | Todi Lab    |             |              | CACNA1A                    | UAS-1aCT-70Q                           | Yes                  |
| y[1] sc[*] v[1]; P{y[+7.7]}=UAS-1aCT-70Q}attP2.7-2  | Todi Lab    |             |              | CACNA1A                    | UAS-1aCT-70Q                           | Yes                  |
| w[*]; +; P{w[+mC]}=longGMR-GAL4}3                   | Bloomington | FBst0008121 | 8121         |                            | gmr-Gal4                               | Yes                  |
| w[*]; P{w[+mC]}=longGMR-GAL4}2; +                   | Bloomington | FBst0009146 | 9146         |                            | gmr-Gal4                               | Yes                  |
| w[*]; P{w[+mC]}=sqh-GAL4}2; +                       | Kiehart Lab | FBti0074562 |              |                            | sqh-Gal4                               | Yes                  |
| P{w[+mW.hs]}=GawB}elav[C155]                        | Bloomington | FBst0000458 | 458          |                            | elav-Gal4                              | Yes                  |
| y[1] w[*]; P{w[+mC]}=GAL4-Mef2.R}3                  | Bloomington | FBst0027390 | 27390        |                            | mef2-Gal4                              | Yes                  |
| w[1118]; P{w[+m*]}=GAL4}repo/TM3, Sb[1]             | Bloomington | FBst0007415 | 7415         |                            | repo-Gal4                              | Yes                  |
| y[1] w[*]; P{w[+mC]}=UAS-mCD8::GFP.L}LL5            | Bloomington | FBst0005137 | 5137         |                            | UAS-CD8:GFP                            | Yes                  |
| w[*]; P{w[+mC]}=UAS-DnaJ-1.K}3                      | Bloomington | FBst0030553 | 30553        | CG10578                    | UAS-DnaJ-1                             | Yes                  |
| w[*]; P{w[+mC]}=UAS-ataxin-3-WT}E6.2; +             | Todi Lab    |             |              | Ataxin-3                   | UAS-Ataxin-3-WT                        | Yes                  |
| w[*]; Kap-alpha3[D93]/TM6B, Tb[1]                   | Bloomington | FBst0025397 | 25397        | CG9423                     | Kap-α3 loss of function allele         | Yes                  |
| y[1] v[1]; P{y[+7.7]}v[+t1.8]}=TRIP.JF02686}attP2   | Bloomington | FBst0027535 | 27535        | CG9423                     | Kap-α3 RNAi                            | Yes                  |
| w[1118]; P{GD11489}v21978                           | VDRC        | FBst0454348 | v21978       | CG4968                     | CG4968 RNAi                            | Yes                  |
| w[1118]; P{GD14218}v24030                           | VDRC        | FBst0455268 | v24030       | CG9448                     | trbd RNAi                              | Yes                  |
| w[1118]; +; +                                       | VDRC        |             | VDRC60000    |                            | Isogenic line for VDRC                 | Yes                  |
| y[1] v[1]; P{y[+7.7]}=CaryP}attP2                   | Bloomington | FBst0036303 | 36303        |                            | Isogenic host strain for attP2         | Yes                  |
